# Supplementary material for: Time-lapse live-cell imaging of pyroptosis by confocal microscopy
Source: PubMed Central journal article supplement — STAR Protoc. 2023 Nov 9;4(4):102708. doi: 10.1016/j.xpro.2023.102708 (PMC10679943; doi:10.1016/j.xpro.2023.102708), 2023-11-09

**STAR Protocols, Volume 4**

**Supplemental information**

**Time-lapse live-cell imaging  
of pyroptosis by confocal microscopy**

**Shuai Jiang, Kunpeng Qin, and Li Sun**

## Supplemental Materials

**Figure S1.** Ectopic expression of abalone GSDME-NT in HEK293T cells. GSDME-NT is tagged with mCherry and indicated by red color. Scale bar: 50  $\mu\text{m}$ . Related to step 5.

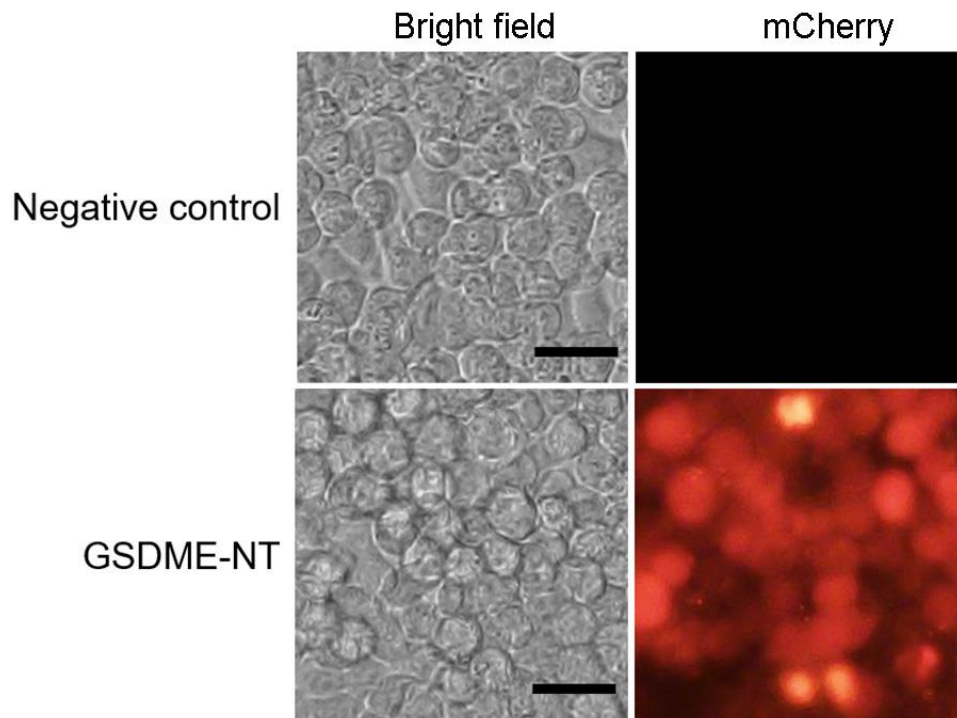

Supplement: mmc1.pdf [file mmc1.pdf]
